# Supplementary material for: Circular RNA circSDHC serves as a sponge for miR-127-3p to promote the proliferation and metastasis of renal cell carcinoma via the CDKN3/E2F1 axis
Source: Springer Nature journal article supplement (doi:10.1186/s12943-021-01314-w), 2021-01-20

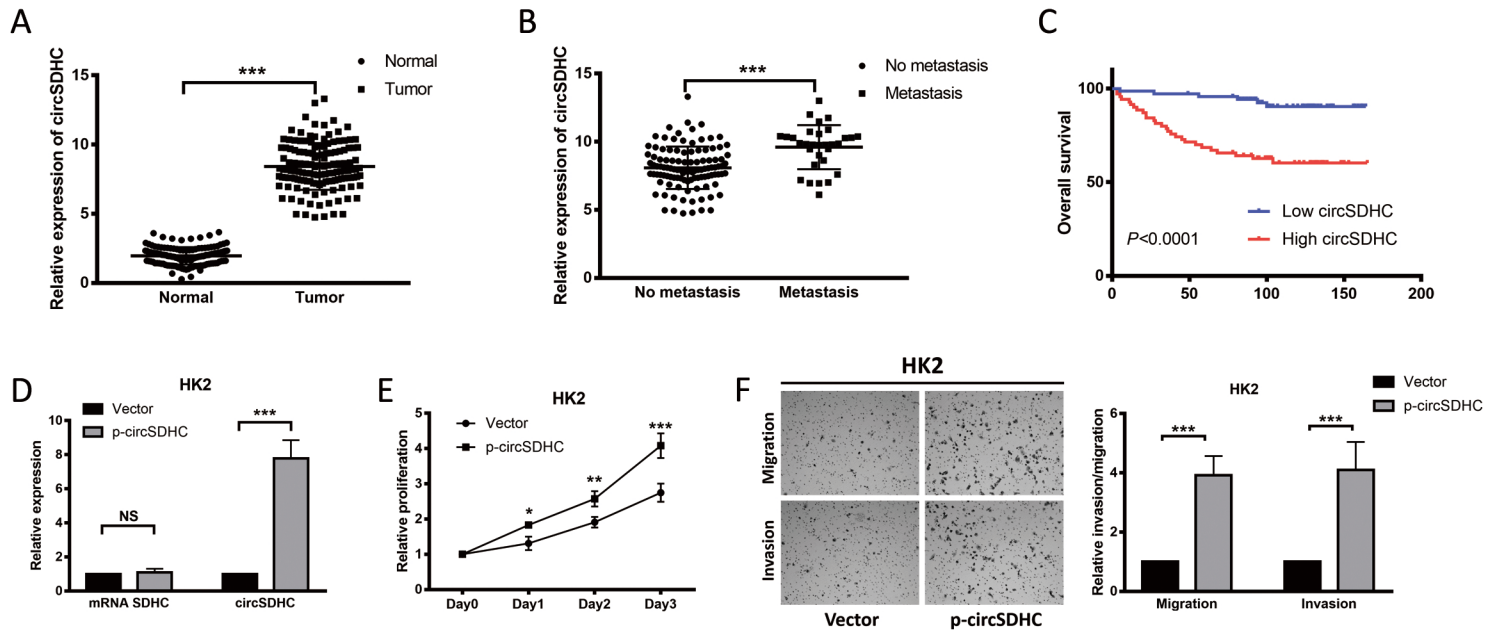

Supplement: MOESM4 [file 18783656]
